# Supplementary material for: Monocyte count as a predictor of cardiovascular mortality in older Korean people
Source: Oxford University Press journal article supplement (doi:10.1093/ageing/afw226), 2016-11-10
Supplement: afw226_Supplementary_data.docx [file afw226_Supplementary_data.docx]

**Supplementary data**

**Appendix 1.** Logistic regression analyses for metabolic syndrome per tertiles of total and differential WBC counts

|  |  | Model 1 | Model 2 |
| --- | --- | --- | --- |
| WBC | 1st tertile | 1.00 | 1.00 |
|  | 2nd tertile | 1.04 (0.76-1.43) | 1.09 (0.78-1.53) |
|  | 3rd tertile | 1.19 (0.87-1.63) | 1.24 (0.89-1.74) |
| Neutrophil | 1st tertile | 1.00 | 1.00 |
|  | 2nd tertile | 0.97 (0.71-1.33) | 1.00 (0.72-1.40) |
|  | 3rd tertile | 1.04 (0.76-1.42) | 1.04 (0.74-1.45) |
| Monocyte | 1st tertile | 1.00 | 1.00 |
|  | 2nd tertile | 1.32 (0.96-1.81) | 1.28 (0.93-1.76) |
|  | 3rd tertile | 1.40 (1.02-1.92) | 1.39 (1.01-1.91) |
| Lymphocyte | 1st tertile | 1.00 | 1.00 |
|  | 2nd tertile | 0.81 (0.59-1.11) | 0.89 (0.63-1.24) |
|  | 3rd tertile | 0.98 (0.72-1.34) | 1.10 (0.78-1.55) |

Data are shown as hazard ratios (95% confidence intervals); Model 1, unadjusted; Model 2, adjusted for age, gender, and BMI
